# Supplementary material
Source: PubMed Central journal article supplement (PMC7878414)
Supplement: NIHMS1652473-supplement-2.pdf [file NIHMS1652473-supplement-2.pdf]

**Supplemental Information**

**A Class of Viral Inducer of Degradation of the Necroptosis Adaptor RIPK3 Regulates  
Virus-Induced Inflammation**

**Zhijun Liu, Himani Nailwal, Jonah Rector, Masmudur M. Rahman, Richard Sam, Grant McFadden and  
Francis Ka-Ming Chan**

**Table S1: CPXV genes included in the siRNA screen. Related to Figure 3.**

| <b>CPXV gene name</b> | <b>Identity with VACV</b> | <b>Query coverage</b> | <b>siRNA sequence used</b>                                                                                             |
|-----------------------|---------------------------|-----------------------|------------------------------------------------------------------------------------------------------------------------|
| CPXV001               | None found                | N/A                   | 5' rArArCrCrUrCrUrUrCrUrGrArUrGrGrArGrUrCrArCrUAA 3'<br>5' rUrUrArGrUrGrArCrUrCrArUrCrArGrArArArGrArGrUrUrA 3'         |
| CPXV002               | None found                | N/A                   | 5' rArUrArCrGrArUrUrArUrGrArUrCrArCrUrArArArUrATT 3'<br>5' rArArUrArUrUrUrUrArGrUrGrArUrCrArUrArArUrCrGrUrArUrCrA 3'   |
| CPXV003               | 81%                       | 93%                   | 5' rArArGrGrArArUrCrArUrCrUrGrArArCrUrUrGrArGrUCA 3'<br>5' rUrGrArCrUrCrArArGrUrUrCrArGrArUrGrArUrUrCrUrUrGrC 3'       |
| CPXV004               | None found                | N/A                   | 5' rGrGrArArUrUrGrGrArArUrUrArGrUrArArCrArGrUrUTA 3'<br>5' rUrArArArCrUrGrArUrArCrUrArArUrUrCrCrArArUrUrCrCrCrA 3'     |
| CPXV005               | 75%                       | 25%                   | 5' rGrArUrArCrArArUrCrUrCrUrUrArUrCrArUrGrUrGrGrGTA 3'<br>5' rUrArCrCrCrArCrArUrGrArUrArArGrArGrArUrUrGrUrArUrCrArG 3' |
| CPXV006               | 90%                       | 16%                   | 5' rArGrArArUrGrArArGrUrCrArCrArUrUrUrCrUrGrUrCAA 3'<br>5' rUrUrGrArCrArGrArArArUrGrUrGrArCrUrUrCrUrCrUrCrA 3'         |
| CPXV007               | None found                | N/A                   | 5' rCrCrArArGrArUrGrArUrArArArArCrArUrUrUrArCrCGG 3'<br>5' rCrCrGrGrUrArArArUrGrUrUrUrUrUrArUrCrArUrCrUrUrGrGrArC 3'   |
| CPXV008               | 26%                       | 88%                   | 5' rGrCrUrArUrGrUrUrGrArUrArArArCrUrArCrUrUrArCrATT 3'<br>5' rArArUrGrUrArArGrUrArGrUrUrUrUrArUrCrArArCrArGrCrUrU 3'   |
| CPXV009               | 40%                       | 87%                   | 5' rCrGrUrGrGrArUrGrArCrArUrCrArArArArArUrUrGrUrCTG 3'<br>5' rCrArGrArCrArArUrGrUrUrUrGrArUrGrUrCrArUrCrCrArCrGrGrU 3' |
| CPXV010               | 31%                       | 54%                   | 5' rGrGrArUrGrArUrCrUrCrUrArUrArArCrArUrUrGrArCrUTG 3'<br>5' rCrArArGrUrCrArArUrGrUrUrUrArGrArGrArUrCrArUrCrCrArU 3'   |
| CPXV011               | 59%                       | 45%                   | 5' rCrUrUrGrGrArUrArUrUrCrUrGrArUrGrArArArArCrAGA 3'<br>5' rUrCrUrGrArUrUrUrCrArUrCrArGrArArUrArUrCrCrCrArGrArU 3'     |
| CPXV012               | None found                | N/A                   | 5' rGrUrCrCrUrUrArCrCrArUrUrGrGrUrArUrArArArACA 3'<br>5' rUrGrUrUrGrUrUrUrArUrArCrCrArArUrGrGrUrArArGrGrArCrArU 3'     |
| CPXV013               | 29%                       | 61%                   | 5' rGrArUrGrArUrArCrUrUrArUrUrCrUrArGrUrArArArUGG 3'<br>5' rCrCrArArUrUrUrArCrUrArGrArArUrArGrUrArUrCrArUrCrArU 3'     |
| CPXV014               | 55%                       | 24%                   | 5' rGrArUrGrUrUrArUrArUrCrGrArCrUrUrCrUrGrArArUrUGA 3'<br>5' rUrCrArArUrUrCrArGrArArGrUrCrGrArUrArUrArArCrArUrCrUrG 3' |
| CPXV015               | None found                | N/A                   | 5' rCrUrGrArUrArCrCrArCrUrArCrArArArArArArGrUrACA 3'<br>5' rUrGrUrArCrUrUrUrUrUrUrGrUrArGrUrGrUrArUrCrArGrGrA 3'       |
| CPXV016               | 24%                       | 60%                   | 5' rGrUrGrArArGrArUrGrArUrArUrCrArUrArArArCrAAC 3'<br>5' rGrUrUrGrGrUrUrUrArArUrGrArUrArUrCrArUrCrUrUrCrArCrUrU 3'     |
| CPXV017               | 34%                       | 90%                   | 5' rArGrArUrArArUrArArArCrArArUrGrUrArUrCrArArCrUGA 3'<br>5' rUrCrArGrUrUrGrArUrArCrArUrUrGrUrUrUrArUrUrArUrCrUrCrA 3' |
| CPXV018               | None found                | N/A                   | 5' rArUrArGrGrUrGrArUrGrArArArUrUrUrCrUrUrArCrCGT 3'<br>5' rArCrGrGrUrArArGrArArArArUrUrUrCrArUrCrArCrArUrArCrA 3'     |
| CPXV019               | 26%                       | 53%                   | 5' rGrUrGrArGrArArUrCrArGrUrArUrGrArUrArGrUrUrArCGA 3'<br>5' rUrCrGrUrArArCrUrArUrCrArUrArCrUrGrArUrUrCrUrCrArCrA 3'   |
| CPXV020               | 31%                       | 85%                   | 5' rGrGrArUrGrUrArArArUrUrArCrArUrUrGrArUrArUrCTA 3'<br>5' rUrArGrArUrArUrCrArArUrUrGrUrArUrUrArArUrArUrCrArUrU 3'     |
| CPXV025               | 94%                       | 35%                   | 5' rArGrArArUrUrGrArArCrGrArGrArUrGrArArArArArATA 3'<br>5' rUrArUrUrUrUrUrUrCrArUrCrUrCrGrUrUrCrArArUrUrCrUrUrG 3'     |
| CPXV031               | 54%                       | 78%                   | 5' rCrUrGrArUrCrUrCrArCrUrArArUrGrUrGrArUrArGrArGAA 3'<br>5' rUrUrCrUrCrUrArUrCrArCrArUrUrArGrUrGrArUrUrCrArGrUrA 3'   |
| CPXV045               | 75%                       | 47%                   | 5' rArGrArArUrCrArGrUrArUrCrUrArGrArGrArUrArUrGrGAT 3'<br>5' rArUrCrCrArUrArUrCrUrCrUrArGrArUrArCrUrGrArUrUrCrUrGrG 3' |
| CPXV051A              | None found                | N/A                   | 5' rGrUrGrGrArUrGrCrArUrArArArUrGrUrUrUrArArArCAT 3'<br>5' rArUrGrUrUrUrArArArCrArUrUrUrArUrUrGrCrArUrCrCrArCrCrG 3'   |
| CPXV058               | None found                | N/A                   | 5' rGrUrArArUrGrArArArUrUrArUrCrArCrUrArUrArUrCAG 3'<br>5' rCrUrGrArUrArUrArGrUrGrArArUrArArUrUrCrArUrUrArCrCrA 3'     |
| CPXV063               | None found                | N/A                   | 5' rGrUrGrGrArUrGrCrArArUrArArArUrGrUrUrUrArArArCAT 3'<br>5' rArUrGrUrUrUrArArArCrArUrUrUrArUrUrGrCrArUrCrCrArCrCrG 3' |
| CPXV078A              | None found                | N/A                   | 5' rGrUrCrCrArUrGrUrUrGrUrCrUrArUrUrUrCrCrArArCrAGG 3'<br>5' rCrCrUrGrUrUrGrGrArArArUrArGrArCrArCrArUrGrGrCrGrC 3'     |
| CPXV096               | None found                | N/A                   | 5' rCrUrUrCrUrUrCrArCrUrGrArArCrUrCrUrGrArArArArATA 3'<br>5' rUrArUrUrUrUrUrCrArGrArGrUrUrCrArGrUrGrArArGrArArUrG 3'   |
| CPXV116               | None found                | N/A                   | 5' rGrGrCrGrUrUrArArArUrArUrArGrArCrArUrUrArUrCAA 3'<br>5' rUrUrGrArUrArArUrGrUrCrUrArUrArUrUrArArArCrGrCrCrArU 3'     |
| CPXV141               | 84%                       | 100%                  | 5' rGrArArCrArGrArUrGrArCrArArGrArGrArArArArArCTA 3'<br>5' rUrArGrUrArUrUrCrUrUrCrUrUrGrUrCrArUrCrUrUrGrUrUrCrArG 3'   |
| CPXV152A              | None found                | N/A                   | 5' rCrArArGrArUrArCrArCrGrArGrGrUrCrArArUrArArAAT 3'<br>5' rArUrUrArUrUrArUrUrGrArCrCrUrCrGrUrGrUrArUrCrUrUrGrGrA 3'   |

|         |            |      |                                                                                                                        |
|---------|------------|------|------------------------------------------------------------------------------------------------------------------------|
| CPXV159 | 85%        | 100% | 5' rGrCrArGrUrArArUrArCrUrArGrCrArArGrArArGrArUAA 3'<br>5' rUrUrArUrCrUrUrUrCrUrUrGrCrUrArGrUrArUrUrArCrUrGrCrArU 3'   |
| CPXV160 | None found | N/A  | 5' rArUrCrArUrUrGrCrUrArArArUrUrUrUrCrArArUrArGTA 3'<br>5' rUrArCrUrArUrUrGrArArArArUrUrUrArGrCrArArUrGrCr 3'          |
| CPXV166 | 87%        | 100% | 5' rCrArArArGrCrArUrUrCrUrArCrUrGrUrUrGrUrUrArArATA 3'<br>5' rUrArUrUrUrArArCrArArCrArGrUrArGrArArUrGrCrUrUrGrGrC 3'   |
| CPXV191 | 74%        | 33%  | 5' rGrUrGrGrArUrArCrUrUrUrGrGrUrGrGrArArUrArGrArUGA 3'<br>5' rUrCrArUrCrUrArUrCrCrArCrArArGrUrArUrCrCrArCrArU 3'       |
| CPXV192 | None found | N/A  | 5' rGrCrCrArUrGrArUrCrArUrGrUrUrArCrArUrArCrArUCA 3'<br>5' rUrGrArUrGrUrArUrGrGrUrArArCrArUrGrArUrCrArUrGrGrCrUrA 3'   |
| CPXV197 | 94%        | 42%  | 5' rGrGrArGrGrArGrArUrGrArUrArCrArGrUrArArArUrCTT 3'<br>5' rArArGrArUrUrUrArCrUrGrUrArUrCrArUrUrCrUrCrCrCrC 3'         |
| CPXV203 | 78%        | 30%  | 5' rGrCrUrArArGrArUrCrUrArUrUrCrUrArUrCrArArArGAA 3'<br>5' rUrUrCrUrUrUrUrGrGrArArUrArGrArArUrCrUrUrUrArGrCrCrU 3'     |
| CPXV204 | 91%        | 32%  | 5' rGrGrArArUrCrArUrUrGrCrUrArArArArGrArArUrGrUrCAA 3'<br>5' rUrUrGrArCrArUrUrCrUrUrUrArGrCrArUrGrArUrUrCrCrArC 3'     |
| CPXV213 | 92%        | 38%  | 5' rArUrGrArArUrGrUrGrGrUrArArArArGrArArUrArCrUTT 3'<br>5' rArArArGrUrArArUrCrUrUrUrArCrCrArCrArUrCrArGrUrU 3'         |
| CPXV214 | None found | N/A  | 5' rArUrGrArUrGrArUrCrArGrArCrArArCrUrCrArArArUAC 3'<br>5' rGrUrArArUrUrUrGrArGrUrUrGrUrCrUrGrArUrCrArUrCrArUrGrG 3'   |
| CPXV215 | 93%        | 24%  | 5' rCrArGrCrUrCrUrGrCrArUrArCrUrArUrUrCrArUGA 3'<br>5' rUrCrArUrGrArArGrArUrArGrUrArUrGrCrArGrArGrCrUrGrArU 3'         |
| CPXV219 | None found | N/A  | 5' rArGrCrArUrUrGrArArUrGrArCrArUrGrUrUrArArArGAA 3'<br>5' rUrUrCrCrUrUrArArArCrArUrGrUrCrArUrUrCrArUrGrCrUrUrC 3'     |
| CPXV220 | 31%        | 94%  | 5' rGrArArUrCrArUrCrUrGrUrUrUrArArArArArCrCrUAT 3'<br>5' rArUrArGrGrUrUrUrUrUrUrArArArArCrArGrArUrGrArUrUrCrArA 3'     |
| CPXV221 | 39%        | 27%  | 5' rArGrGrUrUrCrUrUrUrArCrArArArCrGrArUrArArArGTA 3'<br>5' rUrArCrUrUrUrArUrCrGrUrUrUrGrUrArArArGrArArCrCrUrGrA 3'     |
| CPXV222 | 40%        | 87%  | 5' rCrGrUrGrGrArUrGrArCrArUrCrArArArCrArUrUrGrUrCTG 3'<br>5' rCrArGrArCrArArUrGrUrUrUrGrArUrGrUrCrArUrCrCrArCrGrGrU 3' |
| CPXV223 | 26%        | 88%  | 5' rGrCrUrArUrGrUrUrGrArUrArArArCrUrArCrUrUrArCrATT 3'<br>5' rArArUrGrUrArArGrUrArGrUrUrUrArUrCrArCrArUrArGrCrUrU 3'   |
| CPXV224 | None found | N/A  | 5' rCrCrArArGrArUrGrArUrArArArArArCrArUrUrUrArCrCGG 3'<br>5' rCrCrGrGrUrArArArUrGrUrUrUrUrUrArUrCrArUrCrUrUrGrGrArC 3' |
| CPXV225 | 90%        | 16%  | 5' rArGrArArUrGrArArGrUrCrArCrArUrUrUrCrUrGrUrCAA 3'<br>5' rUrUrGrArCrArGrArArUrGrUrGrArCrCrUrUrCrArUrUrCrUrCrA 3'     |
| CPXV226 | 75%        | 25%  | 5' rGrArUrArCrArArUrCrUrCrUrUrArUrCrArUrGrUrGrGrGTA 3'<br>5' rUrArCrCrCrArCrArUrGrArUrArArGrArGrArUrUrGrUrArUrCrArG 3' |
| CPXV227 | 81%        | 93%  | 5' rArArGrGrArArUrCrArUrCrUrGrArArCrUrUrGrArGrGrUCA 3'<br>5' rUrGrArCrCrUrCrArArGrUrUrCrArGrArUrGrArUrUrCrCrUrUrGrC 3' |
| CPXV228 | None found | N/A  | 5' rArCrUrArArArArUrArUrArArArCrCrUrCrUrUrUrCrUGA 3'<br>5' rUrCrArGrArArArGrArGrUrUrUrArArUrArUrUrUrArGrUrGrA 3'       |
| CPXV229 | None found | N/A  | 5' rArArCrCrUrCrUrUrCrUrGrArUrGrGrArGrUrCrArCrUAA 3'<br>5' rUrUrArGrUrGrArCrUrCrArUrCrArGrArArArGrArGrGrUrUrU 3'       |

**Table S2. Q-PCR and genotyping primers. Related to Figure 7.**

|                |                                                                  |
|----------------|------------------------------------------------------------------|
| <i>Ccl2</i>    | 5'-aggtgtcccaagaagctgta<br>5'-atgtctggaccattccttct               |
| <i>Cxcl2</i>   | 5'-gagcttgagtgtagcgcgccccagg<br>5'-gttagcctgcctttgttcagtatc      |
| <i>Ccl4</i>    | 5'-ttgctcctcacgttcagatttc<br>5'-ggagacacgcgcctataacta            |
| <i>Il6</i>     | 5'-cggagaggagactcacaga.<br>5'-ccagttggtagcatccatc                |
| <i>Ccl8</i>    | 5'- ttctttgcctgctgctcata<br>5'- ctctgtagcttttcagcacc             |
| <i>Cxcl1</i>   | 5'- cgaagtcatagccacactcaa<br>5'- gagcagctctgtctctttctcc          |
| <i>Cxcl10</i>  | 5'- tcaggctcgtcagttctaagt<br>5'- cctgggaagatggtggtaag            |
| <i>Oas1a</i>   | 5'-cagatgttcagcagtggttaga<br>5'- gggttcctctcttgtgtatg            |
| <i>Oas1</i>    | 5'- gtgctcaaggactcaaggtag<br>5'- ctgtggaaacagctcagg              |
| <i>Alox15</i>  | 5'- ctggatgaggagctcaagaaag<br>5'- ccaggfactgctgacta              |
| <i>C3</i>      | 5'- ctggcctctggagtagatagat<br>5'-cagtcttctcggtgtg                |
| <i>C4a</i>     | 5'- tgccaggacctcagataga<br>5'- tctgtggctggcatgttatag             |
| <i>Ptgs1</i>   | 5'- aagatgggtcctggctttac<br>5'- ggtgatactgtcgtccagatt            |
| <i>Arg1</i>    | 5'- acagcaaagcagacagaacta<br>5'- gaaaggaactgctgggataca           |
| <i>Tbp1</i>    | 5'- caaaccagaattgttctcctt<br>5'- atgtggtcttctgaatccct            |
| <i>Ripk3</i>   | 5'-tgtcaagttatggcctactggtgcg<br>5'-aaccatagcctcacctcccaggat      |
| <i>Tnf</i>     | 5'-cccactctgacccctttact<br>5'-tttgagtcttctgatgggtgt              |
| <i>CPXV011</i> | 5'-agtgataatggaaatgatataaacgcc<br>5'-atccgctcctagttctataaatgtatc |
| <i>CPXV016</i> | 5'-tcttagatccagaaaccgataacg<br>5'-ccctaaacaattgacggctg           |
| <i>CPXV017</i> | 5'-aactagatgctggcggaag<br>5'-tccactgccacatcaagac                 |

**Supplementary Figure 1**

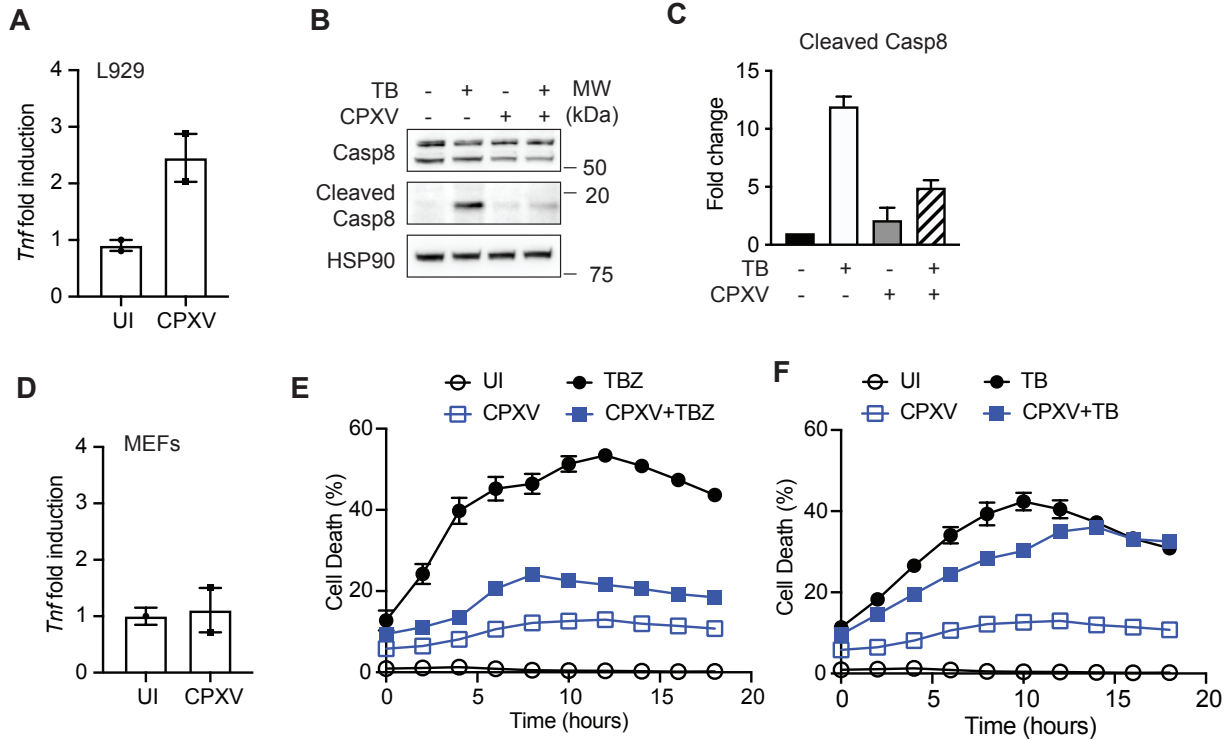

**Figure S1: Cell death responses of L929 and MEFs in response to CPXV infection. Related to Figure 1.** (A) CPXV infection induces autocrine *Tnf* expression in L929 cells. Uninfected (UI) and CPXV-infected L929 cells were harvested at 4 hours post-infection and *Tnf* expression was determined by qPCR. (B) Uninfected or CPXV-infected MEFs were treated with TNF and BV6 for 4 hours as indicated. Caspase 8 cleavage was determined by Western blot. (C) Quantification of caspase 8 cleavage in (B). (D) CPXV did not induce autocrine *Tnf* expression in MEFs. *Tnf* expression was determined 4 hours post-infection by qPCR. (E-F) Uninfected and CPXV-infected MEFs were treated with (E) TNF, BV6 and zVAD-fmk (TBZ) or (F) TNF and BV6 (TB). Cell death was determined by Incucyte using Yoyo-1.

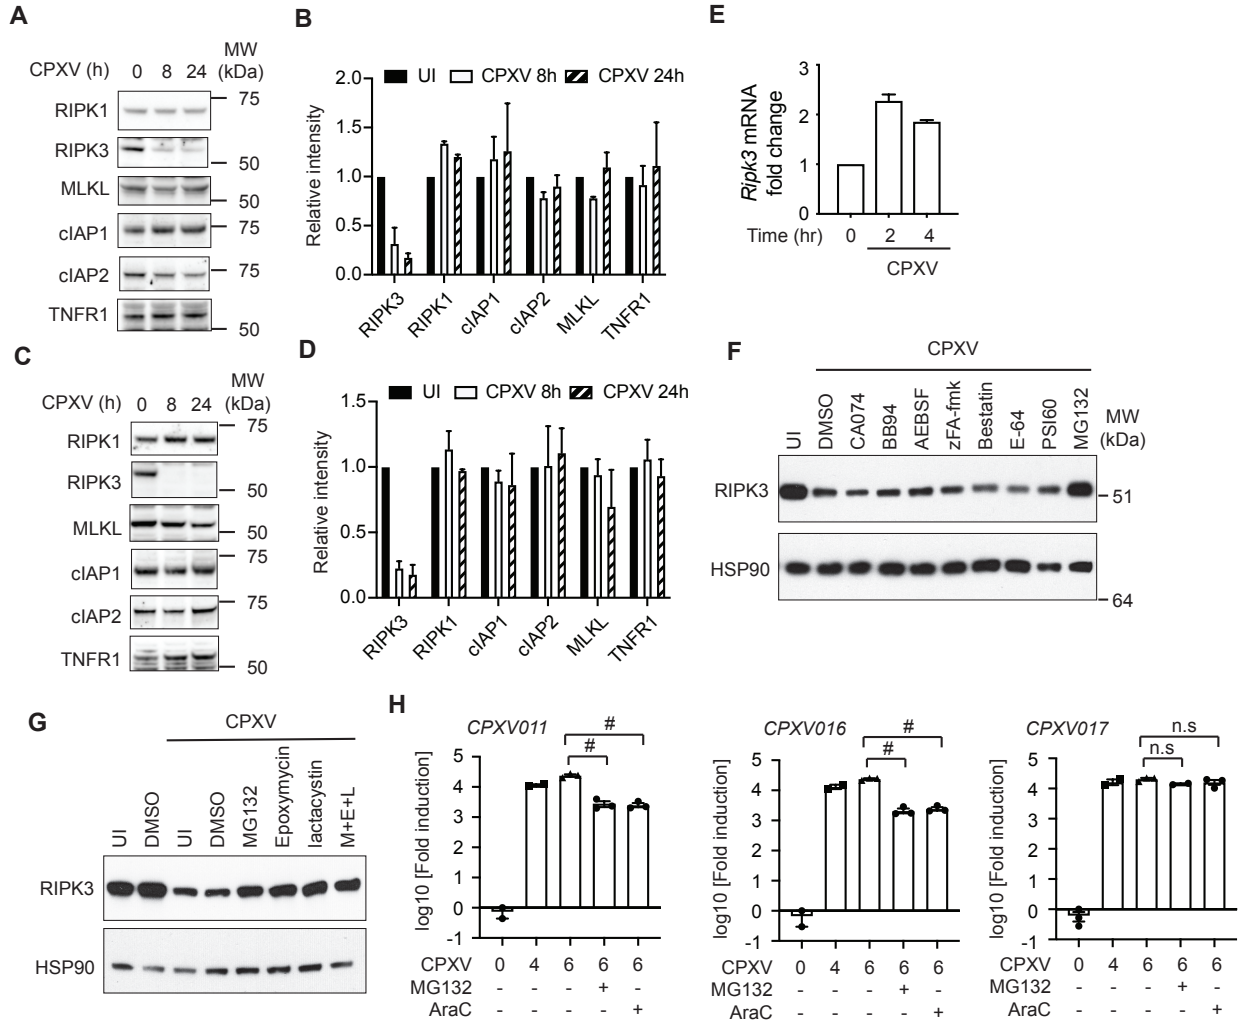

**Figure S2: Effect of CPXV on RIPK3 expression in different cell lines. Related to Figure 2.**

(A-B) Expression of cell death proteins in HT29 cells infected with CPXV. (B) Quantification of results in (A) from two independent experiments. Expression level in uninfected cells at T=0 was normalized to “1”. (C-D) Expression of cell death proteins in Colo205 in response to CPXV. (D) Quantification of results in (C) from two independent experiments. The expression level in uninfected cells at T=0 was normalized to “1”. (E) mRNA level of *Ripk3* in response to CPXV infection was determined by qPCR. (F-G) Uninfected or CPXV-infected L929 cells were treated with the indicated inhibitors. RIPK3 expression was determined by Western blot. M: MG132, E: epoxomicin, L: lactacystin. (H) The effect of MG132 and AraC on CPXV gene expression. L929 cells infected with CPXV and treated with the indicated inhibitors were analyzed for expression of the indicated CPXV genes by qPCR.

**Supplementary Figure 3**

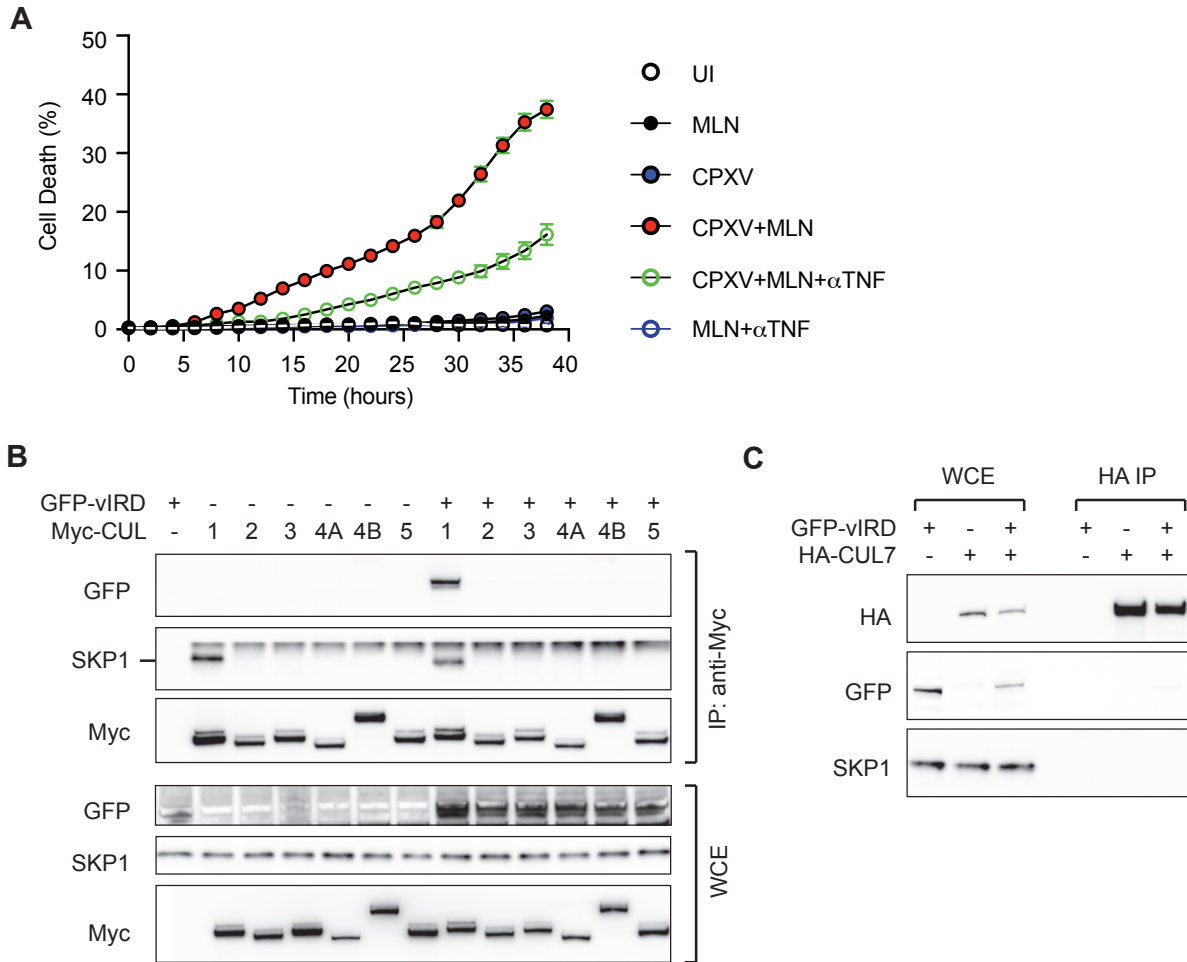

**Figure S3: CUL1 is critical for vIRD-mediated necroptosis resistance. Related to Figure 3.**

(A) Inhibition of CUL1 neddylation sensitizes CPXV-infected cells to autocrine TNF-induced necroptosis. Uninfected and CPXV-infected L929 cells were treated with MLN4924 (MLN) and/or anti-mouse TNF antibody. Cell death was determined by Incucyte live cell imaging. (B) vIRD interacts with CUL1. HEK293T cells were transfected with the indicated plasmids. Immunoprecipitation with Myc-tag antibody was followed by Western blot detection of GFP-vIRD. (C) vIRD does not interact with CUL7. HEK293T cells were transfected with the indicated plasmids. Immunoprecipitation and Western blot were performed as indicated.



Cowpox  
 Ectromelia  
 Monkeypox  
 Variola  
 Camel痘  
 Horse痘  
 Skunk痘  
 Vole痘  
 Tater痘

```

  .....MSTITKKLYCSGFLFLSYISNYEKVNDEMYEMGEMDEIVRIVNDSMWYIPNAFMDGGENEGHISVNNVCHMYLAFDFVD
  .....MGEMDEIVRIVRDSMWYIPNVFIDGGENEGHISVNNVCHMYLAFDFVD
  .....MKMDEIVRIVNDSMWYIPNAFMDGGENEGHISVNNVCHMYLAFDFVD
  .....MDEIVNIVRDSMWYIPNVFMDNGENEGHISVNNVCHMYLAFDFVD
  .....MYEMGEMDEIVSIVSDMWYIPNVFMDNDENEGHISVNNVCHMYLAFDFVD
  .....MDEMDEIVRIVRDSMWYIPNVFMDGGENEGHISVNNVCHMYLAFDFVD
  .....MDTINIVTNDMLYIPDTFLSDS--TDYITIDNVCHMYLAFDFVD
  .....MDDIVNMTANWYIPYVLLSDN--TDCITINNACHMYLAFDFVD
  .....MDEIVSIVSDMWYIPNVFMDNGENEGHISVNNVCHMYLAFDFVD
  
```

43  
 23  
 1 10 20 30 40 50 60 70 80 90

ANK1 ANK2

Cowpox  
 Ectromelia  
 Monkeypox  
 Variola  
 Camel痘  
 Horse痘  
 Skunk痘  
 Vole痘  
 Tater痘

```

  TSSHLFQLVLIKHCNDLNKRLKCGNSPLHCYTMNTRFKPSVLKILLHGMNRFDSKDEKGIPLHHYLIHSLSDNKIFDILTDDIFSKSSDLLLLCYLR
  
```

43  
 23  
 110 120 130 140 150 160 170 180 190

ANK3 ANK4

Cowpox  
 Ectromelia  
 Monkeypox  
 Variola  
 Camel痘  
 Horse痘  
 Skunk痘  
 Vole痘  
 Tater痘

```

  KFNRRINYYVLYKLLTKGSDTNCVDDEGLTSLHYCYCRHISFFHENNYETKRYTKMYAEKRFINTIDHGANNNAVTKIGNTPLHTYLOEHTKHSRPRVY
  KFNGLNYYVLYKLLTKGSDPNCVDDEGLTSLHYCYCRHISAFHESNYYSKSYTKMRAEKRFIYIADHGANNNAVTKIGNTPLHTYLOEHTKHSRPRVY
  KFNGLNYYVLYKLLTKGSDPNCVDDEGLTSLHYCYCRHISAFHESNYYSKSYTKMRAEKRFIYIADHGANNNAVTKIGNTPLHTYLOEHTKHSRPRVY
  KFNGLNYYVLYKLLTKGSDPNCVDDEGLTSLHYCYCRHISAFHESNYYSKSYTKMRAEKRFIYIADHGANNNAVTKIGNTPLHTYLOEHTKHSRPRVY
  KFNGLNYYVLYKLLTKGSDPNCVDDEGLTSLHYCYCRHISAFHESNYYSKSYTKMRAEKRFIYIADHGANNNAVTKIGNTPLHTYLOEHTKHSRPRVY
  KFNGLNYYVLYKLLTKGSDPNCVDDEGLTSLHYCYCRHISAFHESNYYSKSYTKMRAEKRFIYIADHGANNNAVTKIGNTPLHTYLOEHTKHSRPRVY
  KFNGLNYYVLYKLLTKGSDPNCVDDEGLTSLHYCYCRHISAFHESNYYSKSYTKMRAEKRFIYIADHGANNNAVTKIGNTPLHTYLOEHTKHSRPRVY
  KFNGLNYYVLYKLLTKGSDPNCVDDEGLTSLHYCYCRHISAFHESNYYSKSYTKMRAEKRFIYIADHGANNNAVTKIGNTPLHTYLOEHTKHSRPRVY
  KFNGLNYYVLYKLLTKGSDPNCVDDEGLTSLHYCYCRHISAFHESNYYSKSYTKMRAEKRFIYIADHGANNNAVTKIGNTPLHTYLOEHTKHSRPRVY
  KFNGLNYYVLYKLLTKGSDPNCVDDEGLTSLHYCYCRHISAFHESNYYSKSYTKMRAEKRFIYIADHGANNNAVTKIGNTPLHTYLOEHTKHSRPRVY
  
```

43  
 23  
 210 220 230 240 250 260 270 280 290

ANK4 ANK5 ANK6

Cowpox  
 Ectromelia  
 Monkeypox  
 Variola  
 Camel痘  
 Horse痘  
 Skunk痘  
 Vole痘  
 Tater痘

```

  ALLSRGADTRIRNNLDCTPIMEYIKNDCAVACHILMLLNWHEQYQKLOKEEGHLLYLFIKHNQLKHSIDILRYLDRFDIQKDEYYNTMTPLHTAF
  ALLSRGADTRIRNNLDCTPIMEYIKNDCAVACHILMLLNWHEQYQKLOKEEGHLLYLFIKHNQYVGHAFNIRLYLDRFDIQKDEYYNTMTPLHTAF
  ALLSRGADTRIRNNLDCTPIMEYIKNDCAVACHILMLLNWHEQYQKLOKEEGHLLYLFIKHNQYVGHAFNIRLYLDRFDIQKDEYYNTMTPLHTAF
  ALLSRGADTRIRNNLDCTPIMEYIKNDCAVACHILMLLNWHEQYQKLOKEEGHLLYLFIKHNQYVGHAFNIRLYLDRFDIQKDEYYNTMTPLHTAF
  ALLSRGADTRIRNNLDCTPIMEYIKNDCAVACHILMLLNWHEQYQKLOKEEGHLLYLFIKHNQYVGHAFNIRLYLDRFDIQKDEYYNTMTPLHTAF
  ALLSRGADTRIRNNLDCTPIMEYIKNDCAVACHILMLLNWHEQYQKLOKEEGHLLYLFIKHNQYVGHAFNIRLYLDRFDIQKDEYYNTMTPLHTAF
  ALLSRGADTRIRNNLDCTPIMEYIKNDCAVACHILMLLNWHEQYQKLOKEEGHLLYLFIKHNQYVGHAFNIRLYLDRFDIQKDEYYNTMTPLHTAF
  ALLSRGADTRIRNNLDCTPIMEYIKNDCAVACHILMLLNWHEQYQKLOKEEGHLLYLFIKHNQYVGHAFNIRLYLDRFDIQKDEYYNTMTPLHTAF
  ALLSRGADTRIRNNLDCTPIMEYIKNDCAVACHILMLLNWHEQYQKLOKEEGHLLYLFIKHNQYVGHAFNIRLYLDRFDIQKDEYYNTMTPLHTAF
  ALLSRGADTRIRNNLDCTPIMEYIKNDCAVACHILMLLNWHEQYQKLOKEEGHLLYLFIKHNQYVGHAFNIRLYLDRFDIQKDEYYNTMTPLHTAF
  
```

43  
 23  
 310 320 330 340 350 360 370 380 390

ANK6

Cowpox  
 Ectromelia  
 Monkeypox  
 Variola  
 Camel痘  
 Horse痘  
 Skunk痘  
 Vole痘  
 Tater痘

```

  QNCNNKVASLYVLYGYDILPTKDGKTVFDLVFENRNIYKADVNDIHRRLKVSIPMIKSLFYKMSFSPYDDYVKKIIAYGLRDESFAELHRSKFC
  
```

43  
 23  
 410 420 430 440 450 460 470 480 490

F-BOX

Cowpox  
 Ectromelia  
 Monkeypox  
 Variola  
 Camel痘  
 Horse痘  
 Skunk痘  
 Vole痘  
 Tater痘

```

  LNDYKSVFMKNIISFDEISIIERCSHDIRSLKEIRISDTDLTYLVLRTEDIRYHTYLEAHSQKHSIFPMYDDLIEQCHLSMKYKSLIDKALDKLESTI
  
```

43  
 23  
 510 520 530 540 550 560 570 580 590

F-BOX

Cowpox  
 Ectromelia  
 Monkeypox  
 Variola  
 Camel痘  
 Horse痘  
 Skunk痘  
 Vole痘  
 Tater痘

```

  DGQSRISYLPPEIRNIIITKLSDYHLNSMLYGNHKKYYP
  
```

43  
 23  
 610 620 630 640

**Figure S4: Highly conserved vIRD orthologues in orthopoxviruses. Related to Figure 5.**

vIRD orthologues from cowpox, ectromelia, monkeypox, variola, camelpox, horsepox, skunkpox, volepox and taterapox were aligned using Clustal W. Individual ankyrin repeat and the F-box are highlighted. The consensus sequence is shown below the sequence alignment.



**Figure S5: ECTV encodes a functional vIRD orthologue that promotes RIPK3 degradation and necroptosis resistance. Related to Figure 5.** (A) L929 cells infected with VACV or ECTV were monitored for cell death using Incucyte. (B) Expression of ECTV-vIRD but not ECTV-vIRD- $\Delta$ F triggered RIPK3 degradation. HEK293T cells were transfected with the indicated plasmids. Immunoprecipitation and Western blot were performed as indicated. (C) Sequence alignment of CPXV-vIRD and MYXV-m148R. The alignment reveals poor sequence conservation between the two ankyrin repeat-containing proteins.

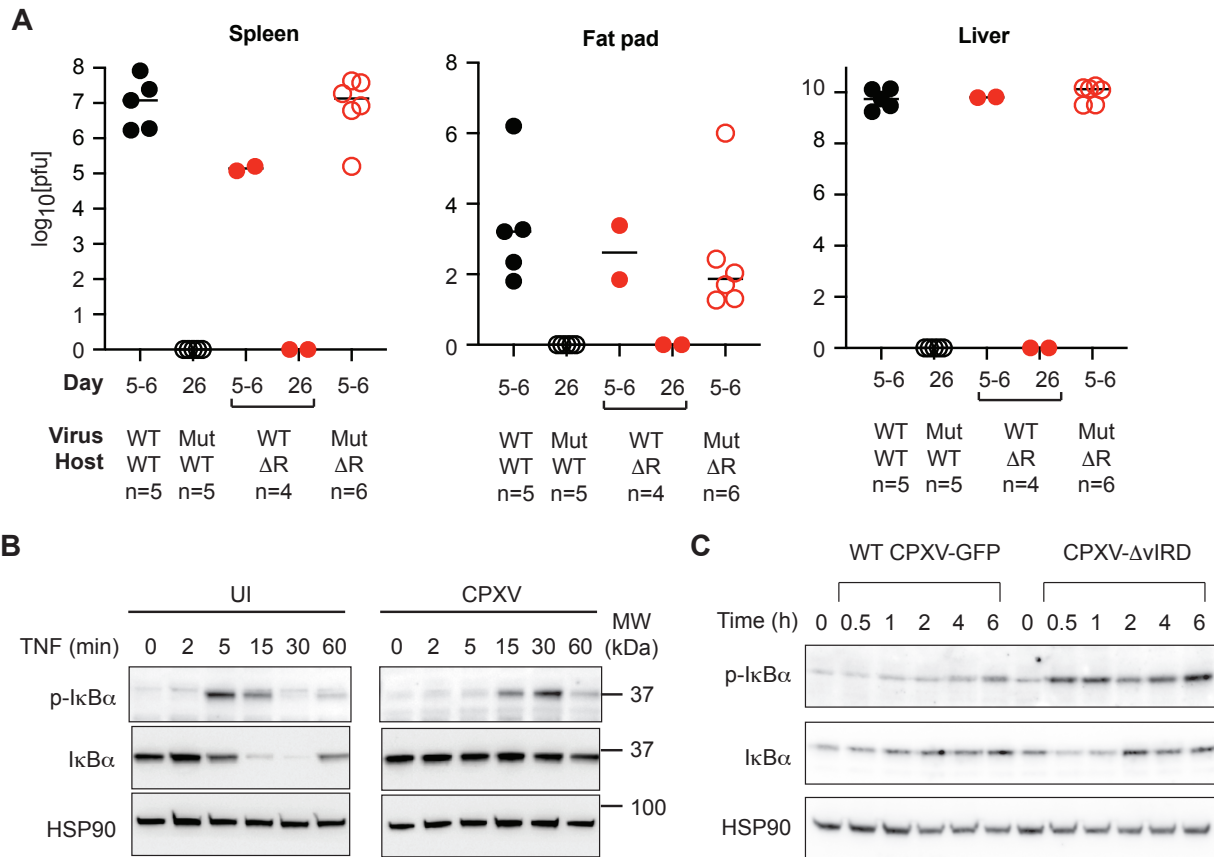

**Figure S6: Role of vIRD on viral clearance and NF- $\kappa$ B activation. Related to Figure 6.**

(A) Viral titers of mice infected with the indicated CPXV were monitored on day 26 or when the mice became moribund and had to be humanely euthanized. (B) Effect of vIRD on NF- $\kappa$ B.

Uninfected (UI) or CPXV-infected MEFs were stimulated with TNF. I $\kappa$ B $\alpha$  phosphorylation and degradation were determined by Western blot as indicated. (C) Human monocytic THP-1 cells

were treated with phorbol ester overnight. Cells were then infected with CPXV or CPXV- $\Delta$ vIRD for the indicated times. I $\kappa$ B $\alpha$  phosphorylation and degradation were determined by

Western blot as indicated.

**Supplementary Figure 7**

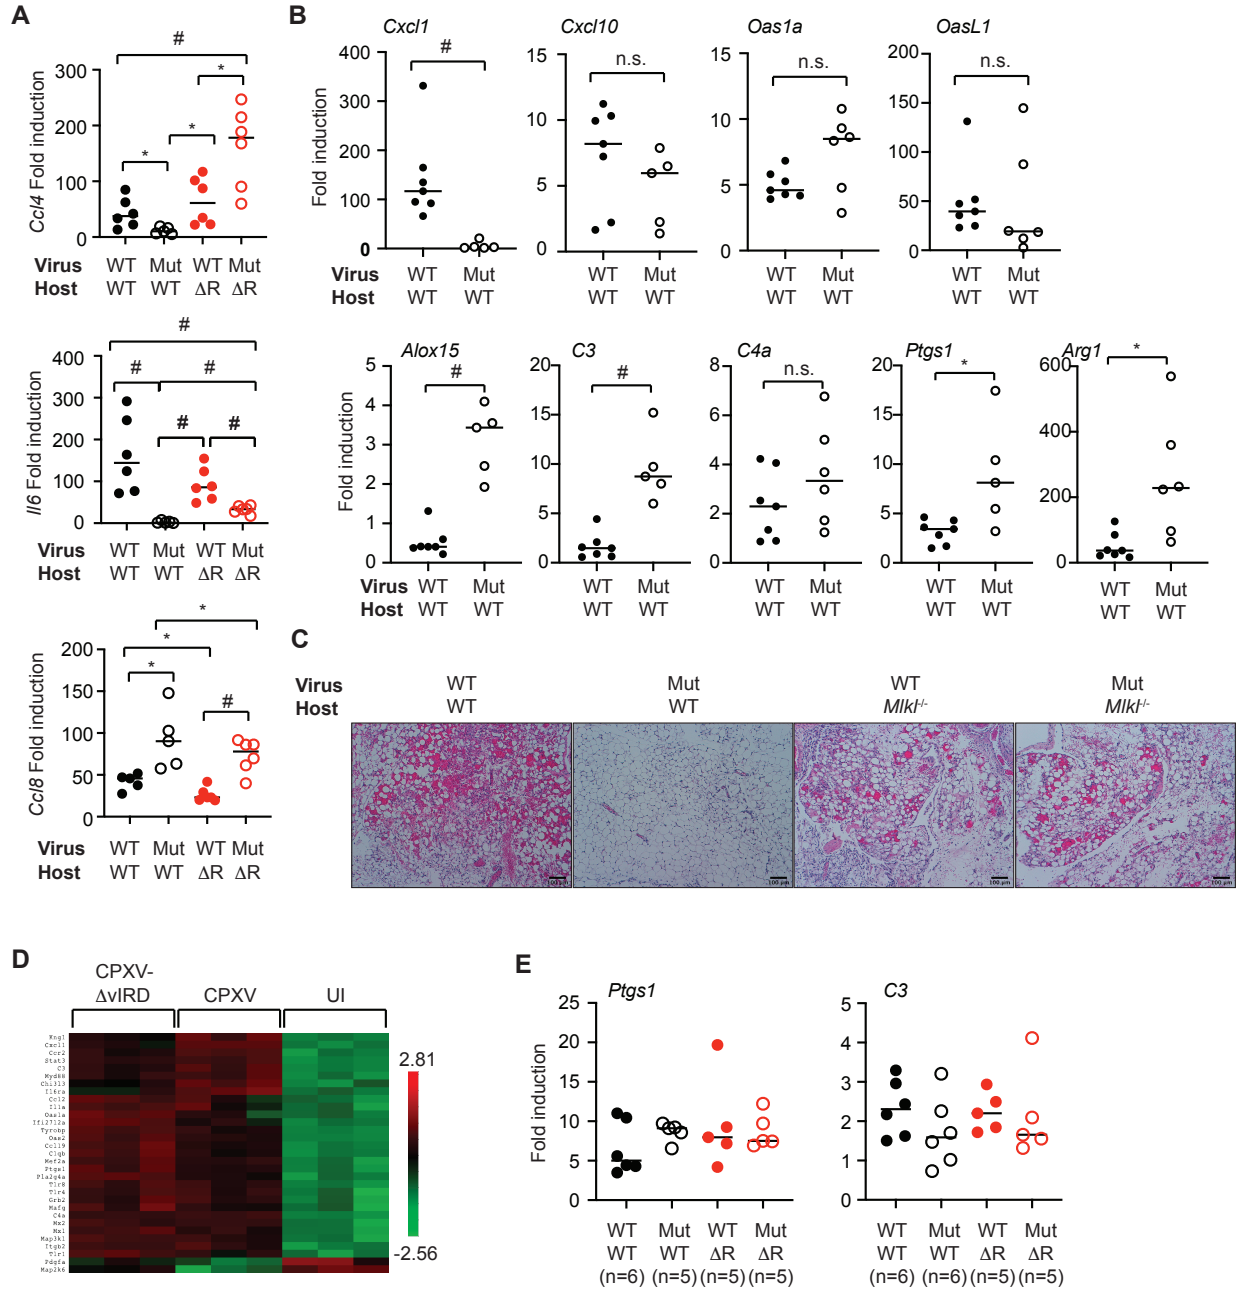

**Figure S7: Tissue-specific regulation of inflammation by vIRD. Related to Figure 7.**

(A-B) Cytokine expression in the visceral fat pad 3.5 days post-infection was determined by qPCR. (C) H&E staining of visceral fat pad from CPXV or CPXV- $\Delta$ vIRD infected wild type or *Mkl<sup>-/-</sup>* mice. Scale bars represent 100  $\mu$ m. (D) Heat map of the top DE genes in the liver identified by Nanostring analysis. Uninfected mice (UI) were used for comparison. (E) qPCR validation of *Ptgs1* and *C3*, two of the top DE genes in the liver identified in the Nanostring analysis.
